# Supplementary material for: Presence of microplastics and microparticles in Oregon Black Rockfish sampled near marine reserve areas
Source: PeerJ. 2023 Feb 14;11:e14564. doi: 10.7717/peerj.14564 (PMC9936869; doi:10.7717/peerj.14564)
Supplement: Supplemental Information 1 — Wilson Score intervals and p-values and confidence intervals for Fig. 2. [file peerj-11-14564-s001.xlsx]

## Sheet: Supplemental Tables 1-5
Supplemental Table 1: Wilson's score intervals				Supplemental Table 2: p-values associated with Figure 2A			Supplemental Table 3: p-values associated with Figure 2B			Supplemental Table 4: Confidence intervals associated with Figure 2A				Supplemental Table 5: Confidence intervals associated with Figure 2B
Location	Upper CI	Lower CI		Tukey Comparison	p-value		Tukey comparison	p-value		Confidence Intervals	Lower CI value	Upper CI value		Confidence Intervals	Lower CI value	Upper CI value
Cascade Head	0.9821	0.5958		Cape Perpetua - Cape Falcon	< 0.001 ***		Otter Rock - Cape Foulweather	0.145		Cape Perpetua - Cape Falcon	-1.16367	-0.36097		Otter Rock - Cape Foulweather	-0.08006	0.70983
Cape Perpetua	0.9863	0.6669		Cascade Head - Cape Falcon	0.3547		Unknown - Cape Foulweather	0.989		Cascade Head - Cape Falcon	-0.62285	0.12256		Unknown - Cape Foulweather	-1.44899	1.2889
Cape Falcon	1	0.7225		Newport - Cape Falcon	< 0.001 ***		Unknown - Otter Rock	0.759		Newport - Cape Falcon	-1.19314	-0.40024		Unknown - Otter Rock	-1.72244	0.93258
Redfish Rocks	0.9838	0.6226		Redfish Rocks - Cape Falcon	< 0.001 ***					Redfish Rocks - Cape Falcon	-1.31365	-0.43431
Newport	0.9873	0.6853		Cascade Head - Cape Perpetua	0.00842 **					Cascade Head - Cape Perpetua	0.08985	0.9345
Otter Rock	0.9896	0.8725		Newport - Cape Perpetua	0.99955					Newport - Cape Perpetua	-0.47779	0.40905
Cape Foulweather	0.953	0.552		Redfish Rocks - Cape Perpetua	0.96987					Redfish Rocks - Cape Perpetua	-0.59411	0.37079
Unknown	1	0.2065		Newport - Cascade Head	0.00320 **					Newport - Cascade Head	-0.96422	-0.12887
				Redfish Rocks - Cascade Head	0.00206**					Redfish Rocks - Cascade Head	-1.08273	-0.16494
				Redfish Rocks - Newport	0.99214					Redfish Rocks - Newport	-0.55567	0.40109

## Sheet: Supplemental Table 6
Verified Microparticles and classifications for the subadult fish
Sample	Piece Number	Morphology	Color	Less than 5mm	OMNIC Match	OMNIC Values	Open Specy Match	Open Specy Value	Classified as	Length(mm)	Lenth (µm)
NP13	2	Fiber	Yellow	Y	wood mahagoni#96	82.29	cardboard/cellulose	0.97	anthropogenic unknown	0.92	920
					wood pink#94	81.73	papercup_cellulosic	0.96
					bentonite(brown)	79.07	cellulose	0.92
					fiber grass#85	78.41	cellulose	0.91
					fiber turf#301	78.17	hydroxyethyl cellulose	0.89
NP13	4	Foam	Yellow	Y	fiber grass#85	82.79	cardboard/cellulose	0.96	anthropogenic unknown	0.368	368
					cellulose#34	81.64	papercup_cellulosic	0.95
					cellophane	77.74	cellulose	0.9
					wood mahagoni#96	77.08	cellulose	0.9
					wood pine#94	76.45	hydroxyethyl cellulose	0.88
NP13	5	Fiber	Clear	Y	cellulose#34	87	cardboard/cellulose	0.97	unknown	0.8118	811.8
					fiber grass#85	82.24	papercup_cellulose	0.95
					fiber viscose#308	82.05	cellulose	0.91
					wood mahagoni#96	78.4	cellulose	0.9
					wood pine#94	78.15	fibre viscose dyed	0.89
NP14	10	Fragment	White	Y	methyl alcohol, 99.9% A.C.S. spectrophotometric grade	72.88	cardboard/cellulose	0.85	unknown	1.43	1430
					methyl alcohol	72.88	papercup_cellulosic	0.84
					bentonite (brown)	72.36	polyethylene chlorinated	0.79
					2-Butene-1,4-diol, 95%	71.23	cellulose	0.77
					methanol	69.5	cellulose	0.77
NP36	3	Film	Clear	Y	polyester epoxide#18	75.9	polytehylene terephthalate amorphous	0.87	synthetic	0.721	721
					polyester#21	74.6	copolyester	0.85
					epoxide resin#20	73.6	polyester	0.85
					polyester epoxide#23	72.99	copolyester	0.85
					copolyester#65	68.45	polyesterterpthalate	0.85
NP39	1	Fiber	Yellow	Y	polyester epoxide#18	75.29	polyvinylchloride	0.83	synthetic	1.5244	1524.4
					poly(2,3-butanediyl isophthatlate)	61.96	polyester epoxide	0.77
					poly(2-butyl-2-ethyl-1,3-propanediyl isophthalate)	59.53	PET	0.76
					poly(2,2-diethyl-1,3-propanediyl isophthalate)	58.57	PET	0.75
					poly(2-ethyl-2-methyl-1,3-propanediyl isophthalate)	58.47	PET	0.75
NP39	4	Film	Pink	Y	polyethylene_high_density#224	98.01	polyethylene wax	0.92	synthetic	0.693	693
					Polyethylene_high_density#87	97.88	polethylene wax oxideized	0.92
					polyethylene_high_density#277	97.42	polyethylene wax	0.91
					polyethylene_high_density#124	97.27	polyethylene high density	0.91
					polyethylene_high_density#80	97.25	polethylene wax oxideized	0.91
NP39	9	Fiber	Clear	Y	cellulose#34	85.68	cardboard/cellulose	0.91	unknown	1.934	1934
					fiber viscose#308	82.89	papercup_cellulosic	0.9
					fiber grass#85	78.7	PVA with Kaolin clay	0.84
					cellulose wipe#113	78.32	cellulose	0.83
					cellulose#31	78.05	cellulose	0.83
NP39	13	Fiber	Clear	Y	cellulose#34	84.38	cardboard/cellulose	0.97	anthropogenic cellulosic	1.805	1805
					fiber viscose#308	78.99	papercup_cellulosic	0.97
					cellophane	77.34	cellulose	0.92
					wood mahagoni#96	77.12	cellulose	0.92
					fiber grass#85	75.9	hydroxyethyl cellulose	0.9
NP57	1	Fiber	Blue	Y	fiber linen#122	81.08	cellulose wipe	0.95	unknown	1.711	1711
					cellulose wipe #113	79.49	cardboard/cellulose	0.95
					cellulose#31	79.24	fiber cotton US pima	0.94
					fiber hemp fine #89	78.72	fibre viscose dyed	0.94
					fiber hemp rough #90	78.62	fiber cotton combers	0.94
NP57	4	Unknown	white	Y	cellulose#34	86.89	cardboard/cellulose	0.93	unknown	1.53	1530
					fiber viscose#308	84.34	papercup_cellulosic	0.92
					fiber viscose dyed#309	79.13	fibre viscose dyed	0.87
					fiber grass#85	73.71	cellulose wipe	0.86
					cellulose wipe #113	72.6	cellulose	0.86
NP59	4	Fiber	Clear	Y	cellulose#34	87.78	cardboard/cellulose	0.97	anthropogenic cellulosic	2.35155	2351.55
					fiber viscose#308	83.22	papercup_cellulosic	0.97
					cellophane	80.63	hydroxyethyl cellulose	0.92
					fiber viscose dyed#309	79.53	methyl cellulose	0.92
					fiber grass#85	76.87	cellulose	0.92
NP60	1	Fiber	Grey	Y	cellophane	79.18	cardboard/cellulose	0.97	anthropogenic unknown	2.4764	2476.4
					cellulose#34	78.39	papercup_cellulosic	0.97
					fiber grass#85	75.38	methyl cellulose	0.95
					wood mahagoni#96	73.25	hydroxyethyl cellulose	0.94
					fiber viscose#308	71.31	hydroxypropyl methyl cellulose	0.93
NP60	9	Fiber	Yellow	Y	cellulose#34	87.73	cardboard/cellulose	0.95	unknown	0.92	920
					fiber viscose#308	79.98	papercup_cellulosic	0.94
					fiber viscose dyed#309	77.42	cellulose	0.87
					cellophane	74.5	cellulose	0.87
					fiber grass#85	72.89	leaf-plant-	0.86
NP60	10	Fiber	Clear	Y	cellulose#34	89.67	cardboard/cellulose	0.96	unknown	0.6113	611.3
					fiber viscose#308	84.89	papercup_cellulosic	0.95
					fiber viscose dyed#309	81.13	cellulose	0.9
					fiber grass#85	79.88	cellulose	0.9
					cellophane	78.2	fibre viscose dyed	0.89
NP65	6	Fiber	White	Y	cellulose#34	89.9	cardboard/cellulose	0.98	anthropogenic cellulosic	2.706	2706
					fiber viscose#308	85.24	papercup_cellulosic	0.97
					cellophane	82.98	cellulose	0.94
					fiber viscose dyed#309	79.93	cellulose	0.93
					fiber grass#85	79.75	cellulose	0.91
NP65	8	Fiber	Clear	Y	fiber grass#85	82.1	cardboard/cellulose	0.98	anthropogenic cellulosic	2.2587	2258.7
					cellulose#34	81.59	papercup_cellulosic	0.97
					fiber viscose#308	79.37	cellulose	0.92
					cellophane	78.6	cellulose	0.92
					wood mahagoni#96	75.45	cellulose	0.9
NP66	2	Fragment	Red	Y	poly(propylene), syndiotactic	81.56	polypropylene	0.97	synthetic	0.11	110
					polypropylene#143	81.15	polypropylene	0.97
					polypropylene	78.86	polypropylene	0.97
					fiber polypropylene#229	78.11	polypropylene	0.96
					polypropylene#247	77.85	poly( 4 methyl 1 pentene)	0.96
NP66	8	Fiber	Clear	Y	cellulse#34	82.91	cardboard/cellulose	0.97	anthropogenic cellulosic	1.5572	1557.2
					cellophane	82.3	papercup_cellulosic	0.97
					bentonite(brown)	80.42	cellulose	0.93
					hydroxyethyl cellulose #100	75.18	cellulose	0.92
					fiber grass#85	75	hydroxyethyl cellulose	0.9
NP67	1	Fiber	Pink	Y	cellulose#34	87.75	cardboard/cellulose	0.98	unknown	1.2611	1261.1
					fiber viscose#308	85.74	papercup_cellulosioc	0.97
					fiber grass#85	84.21	cellulose	0.93
					cellulose wipe#113	82.45	cellulose	0.93
					cellophane	81.82	fibre viscose dyed	0.91
NP68	1	Fiber	Clear	Y	cellulose#34	90.58	cardboard/cellulose	0.98	anthropogenic cellulosic	0.9722	972.2
					fiber viscose#308	86.26	papercup_cellulosic	0.97
					cellophane	83.13	cellulose	0.94
					fiber viscose dyed#309	80.99	celulose	0.93
					fiber grass#85	80	cellulose	0.91
NP68	4	Fiber	Clear	Y	cellulose#34	78.36	cardboard/cellulose	0.96	anthropogenic cellulosic	1.0898	1089.8
					cellophane	78.14	papercup_cellulosic	0.95
					fiber viscose#308	73.66	cellulose	0.91
					cellophane	71.45	hydroxyethyl cellulose	0.9
					fiber viscose dyed#309	71.07	cellulose	0.9
NP68	5	Fiber	Yellow	Y	cellulose#34	85.16	cardboard/cellulose	0.98	anthropogenic unknown	0.8623	862.3
					cellophane	81.7	papercup_cellulosic	97
					bentonite (brown)	80.41	cellulose	0.93
					fiber grass#85	80.08	cellulose	0.93
					fiber viscose#308	79.77	cellulose	0.91
NP68	14	Fiber	Clear	Y	cellulose#34	80.52	cardboard/cellulose	0.96	anthropogenic cellulosic	2.2591	2259.1
					fiber viscose#308	76.64	papercup_cellulosic	0.95
					cellophane	76.13	cellulose	0.89
					fiber viscose dyed#309	72.27	cellulose	0.89
					fiber grass#85	70.39	methyl cellulose	0.88
NP117S	3	Fiber	Blue	Y	cellophane	67.6	cardboard/cellulose	0.96	anthropogenic unknown	3.1133	3113.3
					methyl alcohol, 99.9% spectrophotometric grade	56.78	papercup_cellulosic	0.96
					mask	54.19	cellulose	0.92
					indigo, synthetic	52.96	cellulose	0.91
					fiber grass#85	50.32	methyl cellulose	0.9
NP117S	6	Fragment	Black	Y	styrene ethylene butylene#296	88.54	sealing ring Gardena 1124 large	0.84	synthetic	0.413	413
					styrene acrylonitrile#291	70.69	PE+silicate+bio	0.84
					styrene isoprene#297	70.12	PE with silicate inorganic	0.84
					styrene allyl alcohol#293	69.66	polyethylene chlorinated	0.81
					1,2,3,4-tetraphenylnaphthalene, 97%	68.5	styrene ethylene butylene	0.79
NP117S	7	Fragment	Black	Y	trimethyltin bromide, 95%	54.58	silicone seal reactor	0.91	unknown	0.339	339
					carbon tetrachloride	53.31	HDPE	0.89
					carbon tetrachloride	52.66	silicone seal reactor	0.89
					carbon tetrachloride, 99%	52.66	silicone /PDMS	0.89
					trimethyltin chloride	51.58	PDMS	0.88
FW12#1	1	Fiber	Yellow	Y	wood mahagoni#96	83.5	cardboard/cellulose	0.88	unknown	0.2971	297.1
					fiber grass#85	83.19	papercup_cellulosic	0.86
					wood beech#85	80.61	PVA with Kaolin clay	0.85
					cellulose wipe#113	79.93	cellulose	0.79
					fiber_poplar_down#245	79.73	cellulose	0.79
FW12#1	9	Fragment	Black	Y	polyester#21	75.16	epoxide resin	0.94	synthetic	0.345	345
					epoxide resin#20	71.98	polytehylene terephthalate amophous	0.94
					polyester epoxide#23	71.57	polyethylene terephtalate	0.93
					polyester epoxide#18	66.78	polyesterpthalate	0.93
					polyester275	65.78	PET	0.92
FW12#1	11	Foam	Clear	Y	cellophane	73.62	cardboard/cellulose	0.96	anthropogenic unknown	0.45	450
					mask	59.18	papercup_cellulosic	0.95
					fibre grass#85	56.98	cellulose	0.9
					cellulose#31	56.7	cellulose	0.9
					cellulose wipe#113	56.64	cellulose wipe	0.9
FW12#1	13	Film	Clear	Y	cellulose acetate filter 64	84	fibre cotton US pima	0.9	unknown	0.837	837
					fiber linen#122	82.89	resin dispersion	0.9
					fibre cotton uzbekistan#49	81.14	fibre cotton combers	0.9
					cellulose wipe#113	81.08	polychloroprene	0.9
					fibre cotton US pima#48	81.07	fibre Indian raw cotton	0.89
FW12#2	25	Fiber	Clear	Y	cellophane	83.45	cardboard/cellulose	0.97	anthropogenic cellulosic	0.3762	376.2
					fiber grass#85	81.02	papercup_cellulosic	0.97
					mask	80.23	cellulose	0.95
					cellulose wipe#113	77.11	cellulose	0.93
					fiber kapok#106	76.65	cellulose	0.91
FW12#2	26	Fiber	Yellow	Y	mask	75.41	cardboard/cellulose	0.96	anthropogenic unknown	0.7717	771.7
					cellulose wipe#113	72.75	papercup_cellulosic	0.95
					fiber linen#122	71.94	cellulose	0.89
					cellulose#31	71.74	cellulose	0.89
					fiber grass#85	71.48	cellulose wipe	0.88
FW12#2	36	Fragment	Grey	Y	polyethylene chlorosulfonated#223	45.93	polyethylene chlorosulfonated	0.92	unknown	0.323	323
					fiber jute#104	44.77	polychloroprene	0.91
					fiber grass#85	44.1	resin dispersion	0.81
					bentonite (brown)	43.97	poly(vinyl formal)	0.79
					fiber viscose#308	42.11	fibre viscose	0.79
FW21	3	Film	Clear	Y	chitin from crustacean shells	80.89	cardboard/cellulose	0.93	anthopogenic cellulosic	3.1335	3133.5
					cellophane	59.59	papercup_cellulosic	0.93
					bentonite (brown)	56.27	hydroxyethyl cellulose	0.86
					methyl cellulose#128	53.03	methyl cellulose	0.86
					fiber grass#85	52.35	cellulose	0.85
FW21	4	Fiber	Grey	Y	cellophane	73.64	cardboard/cellulose	0.97	anthropogenic unknown	1.591	1591
					fibre grass#85	70.49	papercup_cellulosic	0.97
					cellulose#34	70.1	methyl cellulose	0.93
					fibre viscose#308	65.59	hydroxyethyl cellulose	0.92
					wood mahagoni#96	65.14	cellulose	0.92
FW21	10	Fiber	Clear	Y	cellulose#34	85.88	cardboard/cellulose	0.96	anthropogenic cellulosic	2.0481	2048.1
					fibre viscose#308	81.16	papercup_cellulosic	0.96
					fibre grass#85	79.58	cellulose	0.89
					cellophane	78.12	cellulose	0.88
					fibre viscose dyed#309	77.17	methyl cellulose	0.88
FW21	12	Fiber	Clear	Y	mask	87.95	cardboard/cellulose	0.98	anthropogenic cellulosic	0.9555	955.5
					fiber linen#122	87.35	papercup_cellulosic	0.97
					cellulose wipe#113	85.73	cellulose	0.93
					cellulose#31	85.1	cellulose	0.93
					fiber flax#82	84.35	cellulose wipe	0.93
FW21	17	Fragment	Clear	Y	bentonite (brown)	71.17	cardboard/cellulose	0.76	unknown	0.251	251
					methyl alcohol, 99.9% spectrophotometic grade	49.76	papercup_cellulosic	0.75
					cellophane	47.08	PVA with Kaolin clay	0.73
					fiber viscose#308	45.91	silicone/PDMS	0.71
					D-erythose, tech., approx 60%	45.3	PDMS	0.7
FW77	1	Fragment	Silver	Y	poly(ethylacrylate:st:acrylamide)	65.72	lahmian medium acrylic paint	0.85	synthetic	0.244	244
					poly(methacrylate), w/oh groups	62.24	alkyd varnish	0.82
					poly(1,4-butylene adipate)	61.37	PET	0.81
					poly(vinyl propionate:acrylate)	61.18	HDPE	0.81
					diisooctyl azelate	60.02	PET	0.81
FW77	15	Fiber	Grey	Y	poly(ethylacrylate:st:acrylamide)	84.21	polycaprolactone	0.81	synthetic	0.505	505
					poly(ethyl acrylate)	78.09	polycaprolactone	0.81
					tape	74.58	acrylonitrile butadiene styrene	0.79
					poly(methacrylate), w/oh groups	74.53	polyurethane	0.78
					poly(methyl acrlaye)	72.83	polyurethane acrylic resin	0.77
FW77	23	Fragment	Grey	Y	bentonite (brown)	59.92	resin dispersion	0.93	unknown	0.203	203
					fiber grass#85	54.64	cardboard/cellulose	0.88
					fiber cocoanut#40	51.16	fibre jute	0.87
					cellulose wipe#113	50.9	cellulose wipe	0.87
					wood mahagoni#96	49.83	cellulose	0.87
FW77	27	Fiber	Black	Y	mask	92.41	cardboard/cellulose	0.97	anthropogenic unknown	1.1339	1133.9
					cellulose#31	83.1	papercup_cellulosic	0.96
					fiber cotton combers#47	81.16	cellulose	0.95
					cellulose acetate filter ATR 64	80.77	cellulose	0.93
					fiber cotton US pima#48	79.83	hydroxyethyl cellulose	0.9
FW77	28	Fiber	Blue	Y	mask	93.75	cardboard/cellulose	0.95	anthropogenic unknown	1.1846	1184.6
					cellulose#31	84.43	papercup_cellulosic	0.94
					fiber cotton combers#47	84.24	cellulose	0.88
					cellulose acetate filter ATR 64	84.05	cellulose	0.87
					fiber cotton US pima#48	82.65	methyl cellulose	0.87
FW79	black	Fragment	Black	unknown	wool cashmere afghanistan#266	75.79	fibre silk slubbing	0.83	natural	unknown	unknown
					wool#311	75.69	fibre mulberry silk	0.82
					wool cashmere mahgolia#29	75.53	fur red deer	0.79
					scoured wool not made rough#287	75.14	fibre tussah silk	0.78
					wool raw chasmere afghanistan#267	75.07	fur angora rabbit	0.74
FW14	2	Fiber	Yellow	Y	wood pine#94	84.77	cardboard/cellulose	0.96	anthropogenic unknown	2.17745	2177.45
					wood mahogoni#96	83.28	papercup_cellulosic	0.95
					fibre grass #85	81.36	cellulose	0.89
					fiber turf#301	77.86	cellulose	0.88
					cellophane	76.47	methyl cellulose	0.88
FW14	5	Fiber	Clear	Y	cellulose#34	88.07	cardboard/cellulose	0.96	anthropogenic cellulosic	2.42946	2429.46
					fiber viscose#308	80.44	papercup_cellulosic	0.95
					fiber viscose dyed#309	79.06	cellulose	0.89
					cellophane	77.67	cellulose	0.88
					fiber grass#85	72.78	cellulose	0.86
FW20	1	Fiber	Blue	Y	poly(ethylacrylate:st:acrlamide)	89.34	polycaprolactone	0.9	synthetic	0.3349	334.9
					tape	82.67	polycaprolactone	0.86
					poly(ethyl acrylate)	82.32	polyurethane	0.86
					amyl formate, 97+%	79.03	polyurethane	0.85
					poly(methylacrylate), w/OH groups	78.97	polyurethane	0.85
FW20	6	Fiber	Clear	Y	fibre grass#85	70.03	cardboard/cellulosic	0.93	unknown	0.8354	835.4
					tape	66.91	papercup_cellulosic	0.93
					fiber kapok#106	66.37	cellulose	0.86
					fibre linen#122	62.66	cellulose	0.86
					mask	62.65	leaf-plant	0.84
FW25	4	Fiber	Clear	Y	mask	92.63	cardboard/cellulose	0.97	anthropogenic cellulosic	1.55888	1558.88
					cellulose#31	88.16	papercup_cellulosic	0.97
					cellulose wipe#113	87.82	cellulose	0.93
					fiber linen#122	86.1	cellulose	0.92
					cellulose acetate filter ATR 64	84.45	hydroxyethyl cellulose	0.89
FW25	14	Fiber	Clear	Y	mask	88.08	cardboard/cellulose	0.98	anthropogenic cellulosic	1.06556	1065.56
					cellulose#31	84.14	papercup_cellulosic	0.97
					cellulose wipe#113	83.85	cellulose	0.95
					cellophane	81.75	cellulose	0.94
					fiber grass#85	80.9	hydroxyethyl cellulose	0.91
FW26	4	Fiber	Blue	Y	cellophane	66.3	cardboard/cellulose	0.85	unknown	0.7349	734.9
					fibre grass#85	66.16	papercup_cellulosic	0.85
					fiber kapok#106	64.56	cellulose	0.78
					tape	64.41	cellulose	0.77
					mask	63.3	PDMS	0.75
FW27	13	Nurdle	White	Y	bentonite (brown)	71.45	cardboard/cellulose	0.91	unknown	0.259	259
					cellulose#34	58.82	papercup_cellulosic	0.9
					fiber grass#85	55.82	polyethylene chlorinated	0.86
					hydroxethyl ellulose #100	55.55	fiber viscose dyed	0.86
					wood pine#94	54.77	cellulose	0.84
FW27	14	Fragment	Green	Y	bentonite(brown)	56.7	resin dispersion	0.9	unknown	0.186	186
					fiber grass#85	53.92	polychloroprene	0.89
					fiber jute#104	53.16	polyethylene chlorosulfonated	0.87
					cellulose wipe#113	51.69	fibre jute	0.85
					fiber urtica dioica L conar fibra#81	50.77	cellulose wipe	0.84
FW27	17	Fragment	Black	Y	2-Fluoroethanol, 85%	65.62	cardboard/cellulose	0.9	unknown	0.14	140
					boron trifluoride dihydrate, 95\6%	61.37	papercup_cellulosic	0.89
					ethylene glycol	60.22	vinylidene chloride acrylonitrile	0.88
					methanol	60.08	cellulose	0.82
					nitrosonium tetrafluoroborate	59.75	methyl cellulose	0.81
FW27	21	Film	Clear	Y	methyl alcohol, 99.9% A.C.S. spectrophotomethric grade	74.32	cardboard/cellulose	0.79	unknown	0.995	995
					methyl alcohol	74.32	papercup_cellulosic	0.78
					methanol	70.85	polyethylene chlorinated	0.78
					2-butene -1,4-Diol, 95%	69.76	polyethylene chlorinated	0.75
					bentonite (brown)	69.57	sealing ring Gardena 2824 medium	0.72
FW27	22	Fiber	Clear	Y	cellulose#34	87.54	cardboard/cellulose	0.95	unknown	1.0583	1058.3
					fiber viscose#308	82.28	papercup_cellulosic	0.94
					fiber grass#85	80.92	cellulose	0.88
					fiber viscose dyed#309	78.62	cellulose	0.87
					wood mahagoni#96	75.58	leaf-plant	0.86
FW28	6	Fiber	Clear	Y	cellulose#34	87.81	cardboard/cellulose	0.98	anthopogenic cellulosic	0.35739	357.39
					cellophane	82.27	papercup_cellulosic	0.97
					fiber viscose#308	80.78	cellulose	0.93
					fiber viscose dyed#309	78.33	cellulose	0.92
					fibre grass#85	75.27	hydroxyethyl cellulose	0.9
FW30	2	Fiber	Clear	Y	cellulose#34	88.91	cardboard/cellulose	0.98	anthopogenic cellulosic	1.2124	1212.4
					fiber viscose#308	85.04	papercup_cellulosic	0.97
					cellophane	82.23	cellulose	0.92
					fiber grass#85	81.17	cellulose	0.92
					fiber viscose dyed#309	79.7	hydroxyethyl cellulose	0.9
FW30	3	Fiber	Clear	Y	cellulose#34	88.84	cardboard/cellulose	0.96	anthopogenic cellulosic	1.3916	1391.6
					fiber viscose#308	82.39	papercup_cellulosic	0.95
					fiber viscose dyed#309	79.25	cellulose	0.9
					cellophane	77.58	cellulose	0.89
					fiber grass#85	77.03	hydroxyethyl cellulose	0.87
FW30	4	Fiber	Blue	Y	tape	77.81	cardboard/cellulose	0.96	anthopogenic unknown	0.2973	297.3
					acrylic (ATR corrected)	61.25	papercup_cellulosic	0.95
					polyvinylchloride#140	59.64	cellulose	0.89
					lahmain medium acrylic paint#114	57.78	cellulose	0.88
					acrylic (ATR Ge crystal)	56.72	methyl cellulose	0.87
FW30	11	Fiber	Clear	Y	cellulose#34	72.55	PVA with Kaolin clay	0.84	unknown	0.9546	954.6
					fiber viscose#308	69.75	cardboard/cellulose	0.8
					fiber grass#85	69.54	polyethylene chlorinated	0.8
					fiber viscose dyed#309	66.96	papercup_cellulosic	0.79
					bentonite (brown)	64.66	polyethylene chlorinated	0.75
FW34	3	Fiber	Clear	Y	bentonite (brown)	82.67	cardboard/cellulose	0.92	unknown	0.9993	999.3
					polyethylene chlorinated#221	71.52	papercup_cellulosic	0.91
					fiber grass#85	70.36	cellulose	0.84
					coal#333	67.41	cellulose	0.84
					wood pine#94	66.92	leaf-plant	0.83
FW34	5	Foam	Black	Y	fiber grass#85	48.95	polypropylene with silicate mix	0.8	unknown	0.205	205
					fiber linen#121	43.84	cellulose	0.77
					fiber urtica dioica L conar fibra#81	42.36	cardboard/cellulose	0.77
					bentonite (brown)	42.03	PVA with Kaolin clay	0.76
					coal#333	41.94	papercup_cellulosic	0.8
FW34	6	Film	Yellow	Y	fiber_grass#85	66.66	cardboard/cellulose	0.91	unknown	0.522	522
					fiber kapok#106	63.36	papercup_cellulosic	0.91
					bentonite(brown)	61.41	leaf-plant	0.84
					calcium phosphate, powder	61.07	cellulose	0.84
					wood mahagoni#96	61.01	cellulose	0.84
FW34	11	Fiber	Clear	Y	mask	84.25	cardboard/cellulose	0.96	anthopogenic cellulosic	0.5256	525.6
					fiber grass#85	82.2	papercup_cellulosic	0.95
					cellulose#31	81.06	cellulose	0.89
					fiber linen#122	81.04	cellulose	0.89
					cellulose wipe#113	80.85	methyl cellulose	0.86
FW35	2	Fragment	Yellow	Y	betonite(brown)	74.91	cardboard/cellulose	0.89	unknown	0.675	675
					methyl alcohol, 99.9% A.C.S. spectrophotomethric grade	70.86	papercup_cellulosic	0.89
					methyl alcohol	70.86	cellulose	0.82
					methanol	69.61	cellulose	0.81
					fiber grass#85	67.01	leaf-plant	0.81
FW35	7	Fiber	Clear	Y	mask	90.11	cardboard/cellulose	0.98	anthopogenic cellulosic	0.9028	902.8
					cellulose#31	85.23	papercup_cellulosic	0.97
					cellulose wipe#113	84.34	cellulose	0.94
					fiber linen#122	83.08	cellulose	0.93
					fiber grass#85	81.99	hydroxyethyl cellulose	0.9
FW42	1	Unknown	White	Y	cellulose#34	84.25	cardboard/cellulose	0.97	anthopogenic cellulosic	4.48	4480
					cellophane	80.1	papercup_cellulosic	0.97
					fiber viscose#308	79.72	cellulose	0.91
					fiber grass#85	77.76	cellulose	0.9
					fiber viscose dyed#309	77.22	methyl cellulose	0.89
FW64#1	7	Fiber	Yellow	Y	fiber grass#85	83.27	cardboard/cellulose	0.97	anthropgoenic unknown	1.2692	1269.2
					cellulose#34	79.62	papercup_cellulosic	0.96
					bentonite (brown)	79.32	cellulose	0.91
					wood mahagoni#96	77.48	cellulose	0.9
					wood pine#94	76.86	hydroxyethyl cellulose	0.88
FW64 #1	9	Fiber	Yellow	Y	fiber grass#85	83.69	cardboard/cellulose	0.98	anthopogenic unknown	2.2287	2228.7
					cellulose#34	83.69	papercup_cellulosic	0.97
					cellophane	81.44	cellulose	0.92
					fiber viscose#309	79.51	cellulose	0.91
					wood mahagoni#96	78.89	methyl cellulose	0.9
FW64#2	1	Fiber	Black	Y	fiber grass#85	71.8	cardboard/cellulose	0.93	unknown	0.081167	81.167
					fiber kapok#106	70.34	papercup_cellulosic	0.93
					mask	68.78	cellulose	0.88
					wood mahogoni#96	66.75	cellulose	0.87
					fiber poplar down#245	66.23	fiber kapok	0.87
FW89	6	Fiber	Pink	Y	diisooctyle azelate	85.54	polycaprolactone	0.87	synthetic	0.5277	527.7
					poly(ethyl acrylate)	83.99	polycaprolactone	0.84
					bis(2-ethylhexyl) sebacate, tech., 90%	81.71	polyurethane	0.2
					dihexyl azelate, tech., 65%	81.46	polyurethane	0.82
					dibutyl suberate, 99%	81.42	polyurethane	0.82
FW89S	1	Fiber	Blue	Y	scoured wool not made rough#287	46.65	fiber tussah silk	0.72	unknown	0.179	179
					fur cow#50	46.63	fiber mulberry silk	0.72
					disperse blue 3	46.3	fiber silk slubbing	0.71
					wool raw chasmere afghanistan#266	45.38	fur cat european shorthair	0.71
					fur cat european shorthair#30	45.35	fiber polymaide 6	0.71
FW90G	1	Fiber	Clear	Y	cellulose acetate filter ATR 64	92.47	cardbpard/cellulose	0.97	anthropogenic cellulosic	2.0511	2051.1
					fiber cotton combers#47	91.87	papercup_cellulosic	0.96
					fiber cotton US pima#48	88.45	cellulose	0.95
					fiber cotton uzbekistan#49	87.45	cellulose	0.94
					cellulose#31	86.92	cellulose	0.9
GW90G	5	Fiber	Blue	Y	mask	93.05	cardboard/cellulose	0.97	anthropogenic unknown	0.2275	227.5
					cellulose#31	87.98	papercup_cellulosic	0.96
					cellulose wipe#113	86.98	cellulose	0.93
					cellulose acetate filter ATR 64	86.41	cellulose	0.092
					fiber cotton comners#47	85.7	cellulose	0.89
FW90 G+A	5	Fiber	Clear	Y	mask	91.8	cardboard/cellulose	0.98	anthropogenic cellulosic	0.6407	640.7
					cellulose wipe#113	87.06	papercup_cellulosic	0.98
					cellulose#31	86.7	cellulose	0.96
					fiber linen#122	83.83	cellulose	0.95
					fiber hemp rough#90	81.56	cellulose	0.93
FW92	3	Fragment	Yellow	Y	bentonite(brown)	53.61	silicone/PDMS	0.74	unknown	0.392	392
					cellulose wipe#113	44.65	polypropylene with silicate mix	0.73
					chloral hydrate in KBR	43.47	HDPE	0.73
					carbon tetrachloride	41.78	PDMS	0.73
					methyl alcohol, 99% spectrophotomic grade	41.31	PDMS	0.73
FW93 G+A	7	Fiber	Blue	Y	mask	59.52	cardboard/cellulose	0.87	unknown	0.316	316
					fiber linen#122	56.56	papercup_cellulosic	0.85
					cellulose acetate filter ATR 64	56.07	cellulose	0.83
					fiber cotton combers#47	56.02	vinylidene chloride acrylonitrile	0.83
					fiber cotton US pima#48	55.94	cellulose	0.82
FW93	6	Fragment	Red	Y	polyethylene low density#116	68.3	sealing ring Gardena 2824 large	0.83	unknown	0.29	290
					polyethylene low density linear #270	67.64	chitin from crustacean shells	0.78
					polyethylene low density #118	67.14	sealing ring Gardena 2824 medium	0.76
					polyethylene low density #117	67.1	algae fucus serratus	0.73
					polyethylene foamed#109	66.9	polyethylene chlorinated	0.72
FW93S	1	Fiber	Blue	Y	cellophane	74.14	cardboard/cellulose	0.98	anthropgenic unknown	2.5043	2504.3
					mask	68.5	papercup_cellulosic	0.97
					fiber grass#85	66.67	cellulose	0.93
					cellulose#31	64.99	cellulose	0.93
					cellulose wipe#113	64.3	methyl cellulose	0.91
FW95(119) #2	7	Fiber	Black	Y	cellulose#34	67.7	cardboard/cellulose	0.88	anthopogenic unknown	0.5415	541.5
					fiber-urtica-dioica-L-conar-fibra#81	66.42	papercup_cellulosic	0.87
					fiber viscose#308	65.64	cellulose	0.85
					fiber grass#85	64.02	cellulose	0.83
					fiber viscose dyed#309	62.3	cellulose	0.83
FW95 S2(119)	8	Fragment	Yellow	Y	bentonite(brown)	67.14	cardboard/cellulose	0.95	anthropogenic unknown	0.27	270
					fiber grass#85	53.18	methyl cellulose	0.94
					cellophane	51.33	hydroxypropyl methyl cellulose	0.94
					cellulose wipe#113	48.98	papercup_cellulosic	0.94
					fiber cocoanut#40	48.55	hydroxyethyl cellulose	0.92
FW95 S2(119)	9	Fiber	Yellow	Y	fiber grass#85	86.91	cardboard/cellulose	0.98	anthropogenic unknown	1.7127	1712.7
					wood mahagoni#96	85.15	papercup_cellulosic	0.97
					wood pine#94	82.83	cellulose	0.92
					fiber poplar down#245	81.62	cellulose	0.92
					fiber kapok#106	81.59	cellulose	0.89
FW95 S3(119)	1	Fiber	Clear	Y	cellulose#34	85	cardboard/cellulose	0.97	anthropogenic cellulosic	1.2005	1200.5
					cellophane	81.1	papercup_cellulosic	0.96
					fiber viscose#308	77.71	cellulose	0.91
					fiber grass#85	77.3	cellulose	0.91
					wood mahagoni#96	77.11	hydroxyethyl cellulose	0.89
FW95 S3(119)	5	Fiber	Blue	Y	polyethylene terephthalate#99	88.13	polyester	0.96	synthetic	0.8049	804.9
					polyethylene terephtalate#227	88.05	polyester	0.96
					polyester#171	86.47	polyesterterpthalate	0.95
					epoxide resin#20	86.1	poly(ethylene terepthalate)	0.95
					polyethylene terephthalate#172	85.78	polyesterterpthalate	0.95
FW95 S3(119)	7	Foam	Black	Y	poly(ethyl acrlyate)	87.37	polyurethane acrylic resin	0.87	synthetic	0.301	301
					poly(ethylacrylate:st:acrylamide)	86.14	polycaprolactone	0.85
					poly(methyl acrylate)	80.73	polyurethane	0.85
					poly(1,2-butylene adipate)	79.82	polycaprolactone	0.85
					poly(methacrylate), w/oh groups	78.34	polyurethane	0.84
FW95#2	4	Fiber	Clear	Y	mask	87.89	cardboard/cellulose	0.97	anthropogenic cellulosic	0.6001	600.1
					cellulose wipe#113	83.65	papercup_cellulosic	0.96
					cellulose#31	83.37	cellulose	0.92
					fiber linen#122	81.56	cellulose	0.91
					fiber grass#85	81.33	cellulose	0.88
FW96	1	Fiber	Grey	Y	mask	92.88	cardboard/cellulose	0.97	anthropogenic unknown	2.5151	2515.1
					cellulose#31	84.15	papercup_cellulosic	0.96
					fiber cotton combers#47	82.47	cellulose	0.93
					cellulose acetate filter ATR 64	82.23	cellulose	0.92
					fiber cotton US pima#48	81.17	methyl cellulose	0.9
FW96	3	Fiber	Clear	Y	cellophane	83.85	cardboard/cellulose	0.98	anthropogenic cellulosic	1.2338	1233.8
					mask	83.13	papercup_cellulosic	0.97
					fiber grass#85	81.35	cellulose	0.93
					cellulose wipe#113	80.76	cellulose	0.92
					cellulose#31	80.34	hydroxyethyl cellulose	0.91
FW96	5	Fiber	Blue	Y	cellophane	85.3	cardboard/cellulose	0.98	anthropogenic unknown	0.4207	420.7
					cellulose#34	85.13	papercup_cellulosic	0.97
					fiber viscose#308	76.92	cellulose	0.93
					fiber grass#85	75.78	hydroxyethyl cellulose	0.92
					fiber viscose dyed#309	75.43	cellulose	0.92
FW96	7	Fiber	Clear	Y	wool slubbing rough#313	90.68	fiber tussah silk	0.84	anthropogenic unknown	1.2149	1214.9
					merino scoured wool made rough#126	90.44	fur red deer	0.82
					wool cashmere kasakhstan#28	90.32	polyamide 6	0.82
					wool raw chasmere afghanistan#266	90.12	polyamide 6	0.82
					fur dog#62	89.84	polyamide 6	0.82
FW96	8	Fiber	Clear	Y	mask	89.54	cardboard/cellulose	0.96	anthropogenic cellulosic	0.6813	681.3
					cellulose wipe#113	88.89	papercup_cellulosic	0.95
					fiber linen#122	87.19	cellulose	0.89
					cellulose#31	87.19	cellulose	0.89
					fiber grass#85	85.07	cellulose	0.88
FW96	10	Fiber	Clear	Y	mask	95.07	cardboard/cellulose	0.98	anthropogenic cellulosic	1.3511	1351.1
					cellulose#31	91.55	papercup_cellulosic	0.97
					cellulose wipe#113	89.94	cellulose	0.94
					fber linen#122	89.08	cellulose	0.94
					cellulose acetate filter ATR 64	88.2	cellulose	0.9
FW96	12	Fiber	Clear	Y	mask	92.34	cardboard/cellulose	0.95	unknown	0.549	549
					cellulose#31	89.57	papercup_cellulosic	0.94
					fiber linen#122	87.99	cellulose	0.88
					cellulose wipe#113	87.98	cellulose	0.88
					cellulose acetate filter ATR 64	86.97	leaf-plant	0.86
FW104S	2	Fiber	Black	Y	mask	98.71	cardboard/cellulose	0.98	anthopogenic unknown	1.4975	1497.5
					cellulose#31	91.3	papercup_cellulosic	0.97
					cellulose acetate filter ATR 64	91.26	cellulose	0.93
					fiber cotton combers#47	90.12	cellulose	0.93
					fiber cotton US pima#48	89.43	cellulose	0.9
FW104S	5	Fiber	Black	Y	mask	89.32	cardboard/cellulose	0.97	anthopogenic unknown	1.2751	1275.1
					cellulose#31	83.49	papercup_cellulosic	0.96
					cellulose wipe#113	81.56	cellulose	0.92
					fiber linen#122	81.06	cellulise	0.91
					fiber grass#85	780.62	hydroxyethyl cellulose	0.89
FW112 G+A#1	5	Fiber	Blue	Y	cellophane	71.4	cardboard/cellulose	0.95	anthropogenic unknown	0.9778	977.8
					mask	56.08	papercup_cellulosic	0.95
					fiber grass#85	54.17	cellulose	0.92
					bentonite (brown)	52.77	cellulose	0.9
					sucrose in KBR	52.22	hydroxyethyl cellulose	0.88
FW112 G+A#1	6	Fiber	Blue	Y	mask	86.13	cardboard/cellulose	0.97	anthropgenic unknown	0.741	741
					cellulose#31	80.69	papercup_cellulosic	0.96
					fiber linen#122	78.37	cellulose	0.91
					cellulose acetate filter ATR 64	77.53	cellulose	0.9
					fiber cotton combers#47	77.06	methyl cellulose	0.89
FW112 G+A#1	9	Fiber	Yellow	Y	fiber linen#122	71.04	cardboard/cellulose	0.95	anthopogenic unknown	2.386	2386
					fiber flax#82	69.44	papercup_cellulosic	0.94
					cellulose wipe#113	68.22	cellulose	0.88
					cellulose acetate filter ATR 64	67.77	cellulose	0.88
					mask	66.86	cellulose	0.86
FW112 G+A#1	10	Fiber	Red	Y	tape	91.53	polyurethane acrylic resin	0.91	synthetic	0.2865	286.5
					poly(ethylacrylate:st;acrylamide)	83.37	polyurethane	0.91
					poly(ethyl acrylate)	80.56	polyurethane	0.9
					poly(methyacrylate), with OH groups	77.3	polyurethane	0.9
					poly(butyl methacrylate)	73.53	polycaprolactone	0.9
FW112 G+A#1	13	Fiber	Blue	Y	mask	91.89	cardboard/cellulose	0.98	anthopogenic unknown	1.4343	1434.3
					cellulose acetate filter ATR 64	87.39	papercup_cellulosic	0.97
					fiber linen#122	85.66	cellulose	0.94
					fiber cotton combers#47	85.21	cellulose	0.94
					cellulose#31	85	cellulose	0.91
FW112#2	2	Fiber	clear	Y	fiber kapok#106	81.07	cardboard/cellulose	0.99	unknown	0.5206	520.6
					fiber grass#85	80.15	papercup_cellulosic	0.98
					mask	79.79	cellulose	0.96
					fiber poplar down#245	78.52	hydroxyethyl cellulose	0.96
					cellophane	78.01	fiber popular down	0.95
FW120#1	1	Fiber	Clear	Y	mask	94.21	cardboard/cellulose	0.97	anthopogenic cellulosic	0.5117	511.7
					cellulose#31	87.46	papercup_cellulosic	0.96
					fiber linen#122	84.46	cellulose	0.92
					cellulose acetate filter ATR 64	83.22	cellulose	0.91
					cellulose wipe#113	83.08	hydroxyethyl cellulose	0.88
FW120#1	7	Fiber	Black	Y	cellulose acetate filter ATR 64	90.16	cardbaord/cellulose	0.95	anthopogenic unknown	1.7954	1795.4
					fiber cotton combers#47	89.74	papercup_cellulosic	0.94
					fiber cotton US pima#48	88.14	cellulose	0.91
					fiber cotton uzbekistan#49	87.94	cellulose wipe	0.91
					cellulose#31	86.59	cellulose	0.9
FW120#1	8	Fiber	Clear	Y	cellulose#31	83.79	cardbaord/cellulose	0.91	unknown	0.7847	784.7
					cellulose wipe#113	82.39	papercup_cellulosic	0.9
					cellulose#34	82.39	cellulose	0.83
					fiber viscose#308	81.97	PVA with Kaolin clay	0.83
					fiber linen#122	81.12	cellulose	0.83
FW120#1	19	Film	Yellow	Y	mask	92.41	cardbaord/cellulose	0.97	anthopogenic unknown	0.3714	371.4
					cellullose#31	86.83	papercup_cellulosic	0.96
					cellulose wipe#113	85.27	cellulose	0.91
					fiber linen#122	82.9	methyl cellulose	0.9
					cellulose acetate filter ATR 64	81.74	cellulose	0.9
FW106S	5	Fiber	Blue	Y	fiber grass#85	83.44	cardboard/cellulose	0.97	unknown	0.9258	925.8
					fiber kapok#106	78.88	papercup_cellulosic	0.96
					wood mahagoni#96	78.04	cellulose	0.9
					cellulose wipe#113	76.53	cellulose	0.9
					fiber polar down#245	76.48	leaf-plant	0.88
FW126	4	Fiber	Black	Y	poly(ethylacrylate:st:acrylamide)	87.68	polycaprolactone	0.93	synthetic	0.218263	218.263
					tape	85.28	polycaprolactone	0.9
					poly(ethyl acrylate)	81.3	polyurethane	0.9
					poly(methacrylate), w/OH groups	78.38	polyurethane	0.89
					amyl fomate, 97+%	77.85	polurethane	0.89
FW126	6	Fiber	Black	Y	cellophane	77.17	cardboard/cellulose	0.96	anthropgenic unknown	0.309782	309.782
					fiber grass#85	76.85	papercup_cellulosic	0.95
					fiber kapok#106	73.41	cellulose	0.94
					wood mahagoni#96	72.19	cellulose	0.92
					fiber polar down#245	71.13	cellulose	0.9
FW126	11	Fiber	Clear	Y	mask	84.84	cardboard/cellulose	0.98	anthropogenic cellulosic	1.64917	1649.17
					cellulose wipe#113	84.19	papercup_cellulosic	0.98
					cellulose#31	83.39	cellulose	0.95
					fiber grass#85	82.63	cellulose	0.95
					cellophane	81.57	cellulose	0.91
FW127	1	Fragment	Grey	Y	fiber grass#85	50.72	polychloroprene	0.86	unknown	0.215	215
					cellulose wipe#113	48.31	polyethylene chlorosulfonated	0.85
					fiber jute#104	47.79	fibre viscose	0.84
					bentonite(brown)	46.06	cardboard/cellulose	0.83
					fiber linen#122	46	fibre jute	0.83
FW129	4	Fragment	Brown	Y	bentonite(brown)	62.05	resin dispersion	0.89	unknown	0.183	183
					fiber grass#85	57.44	cardboard/cellulose	0.87
					cellulose#34	53.65	polyethylene chlorinated	0.86
					wood pine#94	52.59	fibre viscose dyed	0.86
					fiber urtica dioica L conar fibra#81	52.29	fibre jute	0.85
FW131A	2	Fiber	Blue	Y	mask	85.46	cardboard/cellulose	0.96	anthropogenic unknown	0.6496	649.6
					fiber cotton combers#47	78.46	papercup_cellulosic	0.95
					cellulose#31	78.43	cellulose	0.91
					cellulose acetate filter ATR 64	78.22	cellulose	0.91
					fiber linen#122	77.99	cellulose	0.87
FW131 A	4	Fiber	Black	Y	mask	93.67	cardboard/cellulose	0.93	anthropogenic unknown	0.1831	183.1
					cellulose acetate filter ATR 64	88.58	papercup_cellulosic	0.92
					cellulose #31	87.06	cellulose	0.87
					fiber cotton combers#47	86.86	cellulose	0.87
					fiber cotton US pima#48	85.52	cellulose	0.83
FW131 A	16	Fiber	Blue	Y	mask	90.56	cardboard/cellulose	0.97	anthropgenic unknown	0.6561	656.1
					cellulose#31	82.72	papercup_cellulosic	0.97
					fiber linen#122	80.52	cellulose	0.92
					cellulose acetate filter ATR 64	80.11	cellulose	0.91
					fiber cotton combers#47	79.92	methyl cellulose	0.91
FW131	2	Fiber	Grey	Y	mask	76.78	cardboard/cellulose	0.97	anthropogenic unknown	1.0343	1034.3
					cellulose#31	69.25	papercup_cellulosic	0.96
					fiber cotton combers#47	68.4	cellulose	0.93
					cellulose acetate filter ATR 64	68.34	cellulose	0.91
					fiber cotton US pima#48	67.57	methyl cellulose	0.91
FW139S	1	Fiber	Blue	Y	mask	83.86	cardboard/cellulose	0.97	anthropogenic unknown	0.7084	708.4
					cellulose#31	78.68	papercup_cellulosic	0.96
					fiber grass#85	75.75	cellulose	0.93
					fiber linen#122	74.94	cellulose	0.92
					cellophane	74.49	methyl cellulose	0.91
FW147	1	Fiber	Clear	Y	cellulose#34	89.59	cardboard/cellulose	0.97	anthropogenic cellulosic	0.8453	845.3
					fiber viscose#308	83.26	papercup_cellulosic	0.96
					cellophane	79.97	cellulose	0.91
					fiber viscose dyed#309	79.86	cellulose	0.91
					fiber grass#85	77.95	cellulose	0.89
FW147	2	Fiber	White	Y	poly(ethyl acrylate)	85.52	cellulose propionate	0.89	synthetic	2.9908	2990.8
					poly(ethylacrylate:st: acrylamide)	84.28	acrylonitrile butadiene styrene	0.82
					tape	80.54	lahmian medium acrylic paint	0.81
					poly(methyl acrylate)	77.76	cellulose acetate butyrate	0.79
					poly(methylacrylate), w/oh groups	74.97	polycaprolactone	0.79
FW147	8	Fiber	White	Y	cellophane	86.29	cardboard/cellulose	0.97	anthropogenic cellulosic	0.9106	910.6
					cellulose#34	85.41	papercup_cellulosic	0.97
					fiber viscose#308	77.18	cellulose	0.95
					fiber viscose dyed#309	75.9	cellulose	0.94
					fiber grass#85	75.09	cellulose	0.91
FW147	9	Fiber	Clear	Y	cellulose#34	89.69	cardboard/cellulose	0.98	anthropogenic cellulosic	1.1916	1191.6
					fiber viscose#308	84.87	papercup_cellulosic	0.98
					cellophane	83.46	cellulose	0.93
					fiber viscose dyed#309	80.72	cellulose	0.93
					fiber grass#85	78.73	hydroxyethyl cellulose	0.92
FW157#1	1	Fiber	Blue	Y	poly(ethyl acrylate)	84.81	polycaprolactone	0.89	synthetic	0.3748	374.8
					poly(ethylacrylate:st:acrylamide)	84.77	polycaprolactone	0.87
					tape	81.42	polyurethane	0.86
					poly(methyl acrylate)	78.71	polyurethane	0.86
					poly(styrene/acrylate ester)	75.88	polyurethane	0.85
FW157#1	5	Fragment	Silver	Y	polyethylene low density #117	76.12	PE+silicate+bio	0.79	unknown	0.164	164
					polyethylene foamed#109	76.03	PE with silicate inorganic	0.79
					polyethylene low density#272	76	brrodcomb once brooded	0.76
					polyethylene oxidized#226	75.37	sealingn ring Gardena 1124 small	0.73
					polyethylene low density#225	75.02	polyethylene	0.73
FW157#2	1	Fiber	Yellow	Y	poly(ethyl acrylate)	77.01	cardboard/cellulose	0.88	unknown	0.32	320
					poly(ethylacrylate:st:acrylamide)	74.83	papercup_cellulosic	0.88
					tape	72.38	leaf-plant	0.88
					poly(methyl arylate)	71.22	fibre kapok	0.84
					poly(1,4-butylene adipate)	67.97	fibre poplar down	0.83
FW157#2	3	Fiber	Blue	Y	mask	79.18	cardboard/cellulose	0.97	Anthropgenic unknown	1.2343	1234.3
					cellulose#31	72.46	papercup_cellulosic	0.96
					cellulose acetate filter ATR 64	71.46	cellulose	0.91
					fiber cotton combers#47	71.39	cellulose	0.91
					fiber linen#122	70.73	methyl cellulose	0.89
FW157#2	4	Fiber	Blue	Y	cellophane	74.3	cardboard/cellulose	0.97	anthropogenic unknown	0.2296	229.6
					fiber grass#85	72.37	papercup_cellulosic	0.96
					mask	70.87	cellulose	0.92
					fiber kapok#106	66.93	cellulose	0.91
					cellulose#31	66.88	methyl cellulose	0.89
FW157A	1	Fiber	Blue	Y	mask	90.12	cardboard/cellulose	0.97	unknown	2.4393	2439.3
					cellulose	77.03	paperup_cellulosic	0.95
					fiber cotton combers#47	76.74	cellulose wipe	0.95
					fiber cotton US pima#48	76.47	cellulose	0.94
					fiber cotton uzbekistan#49	76.34	fibre viscose dyed	0.94
FW157A	2	Fiber	Blue	Y	cellophane	65.37	cardboard/cellulose	0.9	anthropogenic unknown	1.0449	1044.9
					mask	62.13	papercup_cellulosic	0.88
					fiber linen#122	59.33	cellulose	0.84
					fiber grass#85	58.23	celolulose	0.84
					fiber flax#85	56.77	cellulose	0.79
FW157A	8	Unknown	White	Y	mask	81.47	cardboard/cellulose	0.97	unknown	0.297	297
					fiber grass#85	79.8	papercup_cellulosic	0.96
					cellulose#31	78.25	cellulose	0.91
					fiber linen#122	78.18	cellulose	0.9
					cellulose wipe#113	76.79	leaf-plant	0.89
FW157S G+A	1	Fiber	Blue	Y	mask	92.99	cardboard/cellulose	0.97	unknown	2.4703	2470.3
					fiber linen#122	91.24	papercup_cellulosic	0.95
					cellulose wipe#113	90.23	cellulose wipe	0.95
					cellulose#31	90.04	cellulose	0.94
					cellulose acetate filter ATR 64	89.28	fibre viscose dyed	0.94

## Sheet: Supplemental Table 7
Verified Microparticles and classifications for the subadult fish
Gut sample number	Morphology	Color	OMNIC match	OMNIC value	Open Specy	Open Specy Values	Classified as	Length (microns)
GS 1-10	fiber	black	CELLOPHANE	72.93	cardboard/cellulose	0.98	anthropogenic unknown	1286.57
			*Mask 128S Ge ATR #2	70.22	papercup cellulosic	0.97
			fibre grass #85	66.11	cellulose	0.93
			cellulose #31	65.18	cellulose	0.93
			fibre linen#122	63.51	hydroxyethyl cellulose	0.91
GS 2-10	fiber	clear	*Mask 128S GeATR #2	86.98	cardboard/cellulose	0.98	anthropogenic cellulosic	496.35
			cellulose wipe #113	84.47	papercup cellulosic	0.97
			cellulose #31	83.42	cellulose	0.95
			fibre grass#85	82.16	cellulose	0.94
			wood mahagoni #96	81.2	hydroxyethyl cellulose	0.91
GS 3-1	fiber	blue	*Mask 128S GeATR #2	90.91	cardboard/cellulose	0.97	anthropogenic unknown	727.24
			cellulose#31	85.84	papercup cellulosic	0.97
			fibre linen#122	84.57	cellulose	0.93
			fibre cotton combers#47	83.53	cellulose	0.93
			cellulose wipe#113	83.49	hydroxyethyl cellulose	0.89
GS 3-2	fiber	blue	*Mask 128S GeATR#2	97.42	cardboard/cellulose	0.97	anthropogenic unknown	1361.6
			Cellulose acetate filter ATR 64	94.46	papercup cellulosic	0.96
			fibre cotton combers#47	94.02	cellulose	0.95
			fibre cotton pima#48	91.78	cellulose	0.94
			fibre cotton uzbekistan#49	91.15	cellulose	0.9
GS 4-2	fiber	clear	*Mask 128S GeATR #2	93.73	cardboard/cellulose	0.98	anthropogenic cellulosic	467.6
			cellulose#31	87.29	papercup cellulosic	0.97
			fibre cotton combers#47	85.73	cellulose	0.95
			cellulose acetate filter ATR 64	85.24	cellulose	0.94
			fibre linen#122	85.01	cellulose	0.9
GS 4-6	fiber	blue	*Mask 128S GeATR #2	90.35	cardboard/cellulose	0.98	anthropogenic unknown	1007.58
			cellulose#31	83.2	papercup cellulosic	0.97
			cellulose wipe #113	81.26	cellulose	0.95
			fibre linen#122	79.89	cellulose	0.94
			Cellulose acetate filter ATR 64	79.22	hydroxyethyl cellulose	0.9
GS 4-9	fiber	blue	*Mask 128 S GeATR #2	95.71	cardboard/cellulose	0.97	anthropogenic unknown	1017.27
			cellulose#31	86.28	papercup cellulosic	0.97
			fibre cotton combers#47	86.01	cellulose	0.94
			Cellulose acetate filter ATR 64	85.36	cellulose	0.93
			fibre cotton US pima#48	84.93	hydroxyethyl cellulose	0.91
GS 4-10	fiber	clear	polyethylene terephthalate#136	84.05	Polyester	0.97	Synthetic/Plastic	1888.42
			polyethylene terephthalate#99	82.52	poly(ethylene terepthalate)	0.96
			polyethylene terephthalate#227	82.12	polyesterterpthalate	0.95
			polyethylene terephthalate#98	80.71	polyesterterpthalate	0.95
			polyethylene terephthalate#172	80.48	PET	0.95
GS 6-2	fiber	clear	*Mask 128S GeATR #2	94.86	cardboard/cellulose	0.98	anthropogenic cellulosic	1882.31
			cellulose#31	90.07	papercup cellulosic	0.97
			fibre linen#122	89.16	cellulose	0.96
			cellulose wipe#113	89.14	cellulose	0.95
			Cellulose acetate filter ATR 64	88.29	cellulose	0.92
GS 6-6	fiber	clear	*Mask 128S Ge ATR#2	86.09	cardboard/cellulose	0.95	anthropogenic cellulosic	1927.2
			cellulose#31	79.51	papercup cellulosic	0.94
			cellulose wipe#113	77.98	cellulose	0.89
			Cellulose acetate filter ATR 64	77.34	cellulose	0.88
			fibre cotton combers#47	76.81	fibre poplar down	0.86
GS 7-1	fiber	clear	*Mask 128S GeATR #2	89.22	cardboard/cellulose	0.97	anthropogenic cellulosic	1112.02
			cellulose wipe#113	87.95	papercup cellulosic	0.96
			cellulose#31	86.76	cellulose	0.94
			fibre linen #122	86.56	cellulose	0.94
			fibre hemp rough#90	84.52	cellulose	0.91
GS 7-3	fiber	blue	cellulose#34	90.31	cardboard/cellulose	0.97	anthropogenic unknown	410.54
			fibre viscose#308	86.64	papercup cellulosic	0.96
			fibre viscose dyed#309	80.59	cellulose	0.92
			CELLOPHANE	79.65	cellulose	0.92
			fibre grass#85	75.35	cellulose	0.9
GS 8-3	fiber	clear	BENTONITE (brown)	81.77	cardboard/cellulose	0.97	anthropogenic cellulosic	788.97
			CELLOPHANE	80.32	papercup cellulosic	0.97
			fibre grass #85	78.38	cellulose	0.94
			wood mahagoni#96	77.12	cellulose	0.93
			fibre kapok#106	75.57	hydroxyethyl cellulose	0.91
GS 8-5	fiber	clear	*Mask 128S GeATR #2	79.39	cardboard/cellulose	0.96	anthropogenic cellulosic	410.91
			fibre grass#85	77.44	papercup cellulosic	0.95
			CELLOPHANE	75.98	cellulose	0.94
			cellulose wipe#113	75.12	cellulose	0.93
			cellulose#31	74.49	cellulose	0.9
GS 9-2	fiber	blue	*Mask 128S GeATR #2	91.66	cardboard/cellulose	0.97	anthropogenic unknown	1044.85
			cellulose#31	84.99	papercup cellulosic	0.97
			cellulose wipe#113	83.17	cellulose	0.94
			fibre linen#122	82.37	cellulose	0.92
			Cellulose acetate filter ATR 64	81.63	hydroxyethyl cellulose	0.9
GS 9-5	fiber	clear	wood mahagoni#96	79.97	cardboard/cellulose	0.98	anthropogenic cellulosic	862.55
			fibre poplar down#245	79.85	papercup cellulosic	0.97
			fibre poplar down#246	78.78	cellulose	0.94
			wood beech#93	76.51	cellulose	0.94
			fibre kapok#106	75.9	cellulose	0.91
GS 1-4	fiber	clear	cellulose#34	67.86	cardboard/cellulose	0.96	anthropogenic cellulosic	2062.24
			fibre viscose#308	63.3	papercup cellulosic	0.95
			CELLOPHANE	62.32	cellulose	0.91
			fibre viscose dyed#309	61.68	cellulose	0.91
			fibre grass#85	56.6	cellulose	0.9
GS 12L-2	fiber	blue	cellulose#34	88.25	cardboard/cellulose	0.98	anthropogenic unknown	1072.13
			CELLOPHANE	86.51	papercup cellulosic	0.98
			fibre viscose#308	79.56	cellulose	0.95
			fibre viscose dyed#309	77.21	cellulose	0.94
			hydroxyethyl cellulose#100	75.66	hydroxyethyl cellulose	0.92
GS 13S-2	fiber	clear	fibre grass#85	82.09	cardboard/cellulose	0.97	Natural	1461.23
			fibre kapok#106	77.87	papercup cellulosic	0.96
			*Mask 128S GeATR #2	76.61	cellulose	0.91
			wood mahagoni#96	76.31	cellulose	0.91
			cellulose wipe#113	75.85	leaf plant	0.9
GS 14S-1	fiber	blue	CELLOPHANE	79.34	cardboard/cellulose	0.98	anthropogenic unknown	167.18
			fibre grass#85	78.91	papercup cellulosic	0.97
			*Mask 128S GeATR #2	78.27	cellulose	0.94
			cellulose#31	74.05	cellulose	0.92
			wood mahagoni#96	73.15	hydroxyethyl cellulose	0.91
GS 14S-3	fiber	clear	*Mask 128S GeATR #2	85.49	cardboard/cellulose	0.98	anthropogenic cellulosic	632
			fibre grass#85	84.48	papercup cellulosic	0.97
			cellulose wipe#113	81.88	cellulose	0.94
			fibre linen#122	80.74	cellulose	0.93
			wood mahagoni#96	80.16	cellulose	0.91
GS 15L-4	fiber	clear	CELLOPHANE	76.79	cellulose	0.96	anthropogenic cellulosic	1305.76
			CELLOPHANE	66.93	cardboard/cellulose	0.94
			cellulose#31	63.06	cellulose	0.94
			cellulose wipe#113	60.71	papercup_cellulosic	0.94
			fibre linen#122	58.1	cellulose	0.92
GS 16L-4	fiber	blue	cellulose wipe#113	88.54	cardboard/cellulose	0.99	anthropogenic unknown	333.28
			*Mask 128S GeATR#2	88.1	papercup cellulosic	0.98
			fibre grass#85	86.65	cellulose	0.94
			cellulose#31	86.05	cellulose	0.94
			fibre linen#122	85.05	cellulose	0.91
GS 16L-8	fiber	blue	polyethylene terephthalate#99	94.62	polyesterphalate	0.96	Synthetic/Plastic	1559.37
			polyester#171	94.12	PET	0.96
			polyethylene terephthalate#98	92.3	polytehylene terephthalate	0.95
			polyethylene terephthalate#136	92.09	Polyester	0.95
			polyethylene terephthalate#172	91.77	Polyester	0.95
GS 16L-9	fiber	clear	polyethylene terephthalate#136	86.62	Polyester	0.96	Synthetic/Plastic	3839.14
			polyethylene terephthalate#172	86.51	polyesterpthalate	0.95
			polyethylene terephthalate#99	86.31	poly(ethylene terepthalate)	0.94
			polyethylene terephthalate#227	85.9	polyesterterpthalate	0.94
			polyethylene terephthalate#98	85.25	Polyester	0.94
GS 16L-10	fiber	clear	*Mask 128S GeATR #2	78.44	cardboard/cellulose	0.95	anthropogenic cellulosic	1122.75
			cellulose#31	73.09	papercup cellulosic	0.95
			fibre linen#122	70.38	cellulose	0.91
			fibre grass#85	70.37	methyl cellulose	0.9
			Cellulose acetate filter ATR 64	70.33	cellulose	0.9
GS 17-1	fiber	clear	*Mask 128S GeATR #2	91.71	cardboard/cellulose	0.96	anthropogenic cellulosic	2296.08
			cellulose#31	81.77	papercup cellulosic	0.96
			fibre cotton combers#47	79.91	cellulose	0.94
			Cellulose acetate filter ATR 64	79.39	methyl cellulose	0.93
			fibre cotton US pima#48	78.96	hydroxyethyl cellulose	0.91
GS 17-3	fiber	blue	*Mask 128S GeATR#2	80.49	cardboard/cellulose	0.93	anthropogenic unknown	754.76
			fibre cotton combers#47	73.59	papercup cellulosic	0.93
			Cellulose acetate filter ATR 64	72.45	cellulose	0.93
			cellulose#31	71.94	cellulose	0.92
			fibre cotton US pima#48	71.22	cellulose	0.86
GS 18-2	fiber	clear	cellulose#34	89.6	cardboard/cellulose	0.98	anthropogenic cellulosic	2457.27
			CELLOPHANE	84.31	papercup cellulosic	0.97
			fibre viscose#308	83.53	cellulose	0.94
			fibre viscose dyed#309	80.48	cellulose	0.93
			fibre grass#85	76.97	cellulose	0.92
GS 18-4	fiber	blue	CELLOPHANE	79.66	cardboard/cellulose	0.98	anthropogenic unknown	807.84
			cellulose#34	63.81	papercup cellulosic	0.97
			BENTONITE (brown)	61.33	cellulose	0.94
			fibre grass#85	60.56	cellulose	0.93
			fibre viscose#308	58.02	hydroxyethyl cellulose	0.91
GS 18-5	fiber	red	*Mask 128S GeATR #2	95.97	cardboard/cellulose	0.97	anthropogenic unknown	2568.17
			fibre cotton combers#47	92.43	papercup cellulosic	0.96
			Cellulose acetate filter ATR 64	92.12	cellulose	0.95
			cellulose#31	89.9	cellulose	0.95
			fibre cotton US pima#48	89.74	cellulose	0.91
GS 19-7	fiber	blue	*Mask 128S GeATR #2	96.57	cardboard/cellulose	0.98	anthropogenic unknown	1845.52
			cellulose#31	90.16	papercup cellulosic	0.97
			Cellulose acetate filter ATR 64	89.55	cellulose	0.95
			fibre cotton combers#47	88.84	cellulose	0.95
			fibre cotton US pima#48	87.49	cellulose	0.91
GS 21-1	fiber	blue	*Mask 128S GeATR #2	91.18	cardboard/cellulose	0.98	anthropogenic unknown	837.68
			cellulose#31	85.44	papercup cellulosic	0.97
			Cellulose acetate filter ATR 64	83.12	cellulose	0.96
			fibre hemp fine#89	82.71	cellulose	0.95
			fibre linen#122	82.67	cellulose	0.91
GS 23-3	fiber	black	fibre linen#122	75.38	cardboard/cellulose	0.98	anthropogenic unknown	2998.85
			fibre cotton combers#47	75.2	papercup cellulosic	0.96
			fibre cotton US pima#48	74.88	cellulose	0.95
			fibre hemp fine#89	74.67	cellulose	0.95
			fibre cotton uzbekistan#49	74.34	cellulose	0.92
GS 25-2	fiber	black	CELLOPHANE	71.55	cardboard/cellulose	0.92	anthropogenic unknown	1213.39
			fibre grass#85	58.04	papercup cellulosic	0.92
			*Mask 128S GeATR #2	57.6	cellulose	0.89
			wood mahagoni#96	54.77	cellulose	0.88
			INDIGO SYNTHETIC	53.91	cellulose	0.85
GS 26-3	fiber	blue	polyethylene terephthalate#99	91.57	Polyesterterepthalate	0.97	Synthetic/Plastic	784.23
			polyethylene terephthalate#227	91.36	Polyester	0.97
			polyester#171	89.66	PET	0.96
			fiber polyester#217	89.3	Polyester	0.96
			polyethylene terephthalate#172	89.28	Polyesterterepthalate	0.96
GS 27-1	fiber	clear	*Mask 128S GeATR #2	91.6	cardboard/cellulose	0.98	anthropogenic cellulosic	2522.57
			cellulose#31	86.41	papercup cellulosic	0.97
			cellulose wipe#113	83.53	cellulose	0.96
			fibre linen#122	81.9	cellulose	0.96
			fibre cotton combers#47	81.39	cellulose	0.92
GS 27-4	fiber	clear	*Mask 128S GeATR#2	94.82	cardboard/cellulose	0.97	anthropogenic cellulosic	1484.75
			Cellulose acetate filter ATR 64	88.72	papercup cellulosic	0.97
			fibre cotton combers#47	87.92	cellulose	0.93
			cellulose#31	87.4	cellulose	0.93
			fibre cotton US pima#48	86.41	hydroxyethyl cellulose	0.89
GS 28-4	fiber	red	*Mask 128S GeATR #2	96.75	cardboard/cellulose	0.97	anthropogenic unknown	665.88
			fibre cotton combers#47	91.7	papercup cellulosic	0.97
			Cellulose acetate filter ATR 64	91.66	cellulose	0.94
			fibre cotton US pima#48	88.9	cellulose	0.94
			fibre cotton uzbekistan#49	88.01	hydroxyethyl cellulose	0.89
GS 34-2	fiber	clear	cellulose wipe#113	84.23	cardboard/cellulose	0.98	anthropogenic cellulosic	na
			cellulose#31	83.44	papercup cellulosic	0.98
			fibre linen#122	82.2	cellulose	0.96
			fibre hemp rough#90	80.71	cellulose	0.95
			fibre hemp fine#89	80.48	cellulose	0.92
GS 35-1	fiber	blue	CELLOPHANE	78.96	cardboard/cellulose	0.97	anthropogenic unknown	na
			cellulose#34	75.84	papercup cellulosic	0.96
			fibre viscose#308	67.89	cellulose	0.93
			fibre viscose dyed#309	66.49	cellulose	0.92
			hydroxyethyl cellulose#100	64.49	hydroxyethyl cellulose	0.9
GS 39-2	fiber	blue	fibre cotton combers#47	85.93	cardboard/cellulose	0.98	anthropogenic unknown	2423.14
			cellulose#31	85.06	papercup cellulosic	0.97
			fibre cotton US pima#48	83.63	cellulose	0.94
			Cellulose acetate filter ATR 64	83.42	cellulose	0.93
			fibre cotton uzbekistan#49	83.2	hydroxyethyl cellulose	0.89
GS 40-*	fiber	blue	*Mask 128S GeATR#2	97.39	cardboard/cellulose	0.97	anthropogenic unknown	1995.02
			Cellulose acetate filter ATR 64	93.81	papercup cellulosic	0.96
			fibre cotton combers#47	92.63	cellulose	0.95
			cellulose#31	91.62	cellulose	0.94
			fibre cotton uzbekistan#49	91.53	cellulose	0.91
GS 41-4	fiber	blue	polypropylene#247	97.28	polypropylene	0.96	Synthetic/Plastic	311.51
			polypropylene#143	97.19	polypropylene	0.96
			fibre polypropylene dyed#230	97.13	polypropylene	0.95
			polypropylene#325	97.12	polypropylene	0.95
			polypropylene#252	96.88	polypropylene	0.95
GS 42-4	fiber	brown	wool slubbig rough#313	93.78	zein purified	0.89	Natural	1836.72
			wool cashmere kasakhstan#28	93.23	wool slubbing rough	0.88
			merino scoured wool made rough#126	92.99	wool cashmere crossbred	0.87
			wool raw cashmere afghanistan#266	92.89	fur lama	0.87
			scoured wool made rough#126	92.67	fur angora rabbit	0.87
GS 44-1	fiber	blue	polyethylene terepthalate#99	89.21	Polyester	0.96	Synthetic/Plastic	2052.1
			polyethylene terepthalate#136	89.07	poly(ethyleneterepthalate)	0.94
			polyethylene terepthalate#98	87.28	polyesterterpthalate	0.94
			polyethylene terepthalate#172	86.96	Polyester	0.94
			polyethylene terepthalate#174	86.51	polyesterterpthalate	0.94
GS 52-2	fiber	brown	wool slubbing rough#313	91.48	Zein purified	0.88	Natural	3241.26
			wool cashmere kasakhstan#28	91.15	wool slubbing rough	0.86
			wool raw cashmere afghanistan#266	91.14	fur red deer	0.86
			merino scoured wool made rough#126	91.01	fur angora rabbit	0.86
			scoured wool not made rough#287	90.59	wool cashmere crossbred	0.86
GS 54-1	fiber	red	polyethylene terephthalate#99	95.55	polyesterpthalate	0.96	Synthetic/Plastic	920.1
			polyester#171	94.7	Polyester	0.96
			ppolyethylene terepthalate#98	93.35	PET	0.96
			polyethylene terepthalate#136	92.88	Polyester	0.95
			polyethylene terepthalate#172	92.53	polybuthylene terephthalate	0.95
GS 54-4	fiber	clear	cellulose#34	88.94	cardboard/cellulose	0.97	anthropogenic cellulosic	1971.63
			fibre viscose#308	81.44	papercup cellulosic	0.96
			CELLOPHANE	79.33	cellulose	0.92
			fibre viscose dyed#309	79.25	cellulose	0.92
			fibre grass#85	69.85	cellulose	0.91
GS 54-5	fiber	clear	polyethylene low density#225	98.13	HDPE	0.92	Synthetic/Plastic	2326.4
			polyethylene low density#219	98.03	HDPE	0.86
			polyethylene low density#272	97.71	HDPE	0.84
			polyethylene low density#123	97.6	HDPE	0.84
			polyethylene low density#117	97.45	HDPE	0.84
GS 55-7	fiber	blue	polyethylene terepthalate#99	96.03	polyesterterpthalate	0.97	Synthetic/Plastic	1193.33
			polyester#171	95.34	PET	0.96
			polyethylene terephthalate#98	94.44	Polyester	0.96
			polyethylene terephthalate#136	93.86	Polyester	0.96
			polyethylene terephthalate#172	93.23	polytehylene terephthalate	0.96
GS 56-3	fiber	clear	*MasK 128S GeATR #2	82.03	cardboard/cellulose	0.98	anthropogenic cellulosic	1106.15
			wood mahagoni#96	80.64	papercup cellulosic	0.97
			fibre kapok#106	80.48	cellulose	0.94
			fibre poplar down#245	80.06	cellulose	0.92
			fibre grass#85	79.62	hydroxyethyl cellulose	0.91
GS 57-1	fiber	clear	*Mask 128S GeATR #2	85.22	cardboard/cellulose	0.98	anthropogenic cellulosic	1278.44
			cellulose#31	80.68	papercup cellulosic	0.97
			cellulose wipe#113	79.51	cellulose	0.94
			CELLOPHANE	78.4	cellulose	0.93
			BENTONITE (brown)	78.19	hydroxyethyl cellulose	0.9
GS 57-3	fiber	Blue	polyethylene terephthalate#136	84.1	fiber polyester	0.83	Synthetic/Plastic	999.31
			polyethylene terephthalate#99	83.17	PET	0.82
			polyethylene terephthalate#174	82.6	poly(ethylene terephthalate)	0.82
			polyethylene terephthalate#172	82.41	polyester	0.81
			fibre polyester#217	82.38	polyester	0.81
GS 58-1	fiber	blue	CELLOPHANE	69.35	cardboard/cellulose	0.98	anthropogenic unknown	2843.84
			*Mask 128S GeATR#2	65.88	papercup cellulosic	0.97
			cellulose#31	61.46	cellulose	0.95
			fibre linen#122	58.53	cellulose	0.94
			fibre cotton combers#47	58.43	hydroxyethyl cellulose	0.91
GS 58-6	fiber	blue	*Mask 128S GeATR #2	86.92	cardboard/cellulose	0.98	anthropogenic unknown	2224.44
			cellulose#31	81.32	papercup cellulosic	0.97
			CELLOPHANE	79.02	cellulose	0.95
			cellulose wipe#113	77.02	cellulose	0.94
			fibre linen#122	76.47	hydroxyethyl cellulose	0.91
GS 59-2	fiber	clear	CELLOPHANE	69.91	cardboard/cellulose	0.96	anthropogenic cellulosic	847.31
			cellulose#34	68.55	papercup cellulosic	0.95
			hydroxyethyl cellulose#100	67.67	cellulose	0.9
			wood mahagoni#96	67.03	hydroxyethyl cellulose	0.9
			HYDROXYETHYL-BETA-CYCLODEXTRIN MS=1.6	63.81	cellulose	0.89
GS 59-3	fiber	blue	*Mask 128S GeATR #2	93.67	cardboard/cellulose	0.98	anthropogenic unknown	1090.58
			cellulose#31	86.85	papercup cellulosic	0.97
			Cellulose acetate filter ATR 64	85.87	cellulose	0.94
			fibre cotton combers#47	85.22	cellulose	0.93
			fibre cotton US pima#48	85.2	cellulose	0.91
GS 60-2	fiber	clear	*Mask 128S GeATR#2	91.22	cardboard/cellulose	0.98	anthropogenic cellulosic	1074.95
			cellulose wipe#113	89.96	papercup cellulosic	0.97
			cellulose#31	88.06	cellulose	0.95
			fibre linen#122	86.71	cellulose	0.95
			fibre grass#85	85.09	cellulose	0.2
GS 62-2	fiber	clear	cellulose#34	71.26	cardboard/cellulose	0.97	anthropogenic cellulosic	1802.9
			CELLOPHANE	70.62	papercup cellulosic	0.97
			fibre turf#301	68.17	cellulose	0.91
			fibre grass#85	66.24	hydroxyethyl cellulose	0.91
			wood mahagoni#96	65.61	methyl cellulose	0.91
GS 64-4	fiber	clear	*Mask 128S GeATR #2	85.53	cardboard/cellulose	0.95	anthropogenic cellulosic	3182.35
			cellulose#31	81.26	papercup cellulosic	0.94
			Cellulose acetate filter ATR 64	80.68	cellulose	0.88
			cellulose wipe#113	78.92	cellulose	0.88
			fibre cotton combers#47	78.77	cellulose	0.85
GS 65-1	fiber	black	*FW86-LH	80.64	Polyamide	0.8	Anthropogenic unknown	5693.96
			wool raw cashmere afghanistan#266	76.43	Polyamide	0.8
			wool raw cashmere mongolia#267	75.69	Polyamide	0.79
			wool dlubbing rough#313	75.61	Polyamide	0.79
			scoured wool not made rough#287	75.59	nylon 6	0.78
GS 66d-2	unknown	unknown	BENTONITE (brown)	83.58	cardboard/cellulose	0.97	anthropogenic cellulosic	na
			CELLOPHANE	77.92	papercup cellulosic	0.97
			hydroxyethyl cellulose#100	72.28	cellulose	0.93
			HYDROXYETHYL-BETA-CYCLODEXTRIN MS=1.6	70.5	cellulose	0.92
			fibre grass#85	69.57	hydroxyethyl cellulose	0.9
GS 66-1	fiber	clear	*Mask 128S GeATR #2	96.18	cardboard/cellulose	0.97	anthropogenic cellulosic	1847.35
			fibre cotton combers#47	89.05	papercup cellulosic	0.96
			Cellulose acetate filter ATR 64	88.69	cellulose	0.93
			fibre cotton US pima#48	86.67	cellulose	0.92
			cellulose#31	85.88	methyl cellulose	0.9
GS 66-3	fiber	clear	*Mask 128S GeATR#2	96.17	cardboard/cellulose	0.98	anthropogenic cellulosic	730.36
			cellulose#31	92.18	papercup cellulosic	0.97
			Cellulose acetate filter ATR 64	90.86	cellulose	0.94
			fibre cotton combers#47	90.17	cellulose	0.94
			cellulose wipe#113	89.84	cellulose	0.91
GS 67-2	fiber	red	fibre cotton combers#47	79.8	cardboard/cellulose	0.95	anthropogenic unknown	5566.19
			fibre cotton US pima#48	78.68	papercup cellulosic	0.94
			Cellulose acetate filter ATR 64	78.64	cellulose	0.89
			cellulose#31	78.12	cellulose	0.89
			fibre cotton uzebikstan#49	78.08	hydroxyethyl cellulose	0.85
GS 68-3	fiber	clear	polypropylene#325	84.29	Polyamide	0.82	Anthropogenic unknown	na
			polypropylene#247	84.26	copolyamide	0.82
			fibre polypropylene dyed#230	84.13	nylon 12	0.81
			fibre polypropylene#229	83.58	nylon 11	0.81
			*KOH lid polypropylene	83.1	copolyamide	0.8
GS 1-3	fiber	clear	fibre cotton combers#47	51.83	cardboard/cellulose	0.96	anthropogenic cellulosic	2107.42
			cellulose#31	51.81	papercup cellulosic	0.96
			fibre linen#122	51.14	cellulose	0.91
			fibre cotton US pima#48	50.72	cellulose	0.91
			CELLOPHANE	50.69	methyl cellulose	0.88
GS 55-3	fiber	blue	fibre grass#85	72.93	cardboard/cellulose	0.98	anthropogenic unknown	395.11
			CELLOPHANE	71.45	papercup cellulosic	0.97
			fibre kapok#106	71..17	cellulose	0.94
			cellulose#31	70.1	cellulose	0.93
			wood mahagoni#96	68.74	cellulose	0.91
GS 59-4	fiber	blue	CELLOPHANE	55.65	cardboard/cellulose	0.83	anthropogenic unknown	924.84
			hydroxyethyl cellulose#100	49.94	papercup cellulosic	0.83
			cellulose#34	48.59	hydroxyethyl cellulose	0.81
			alginic acid sodium sald ID#10	48.42	cellulose	0.8
			INDIGO SYNTHETIC	44.34	hydroxyethyl cellulose	0.8
GS 64-7	film	grey	chitin from crustacean shell#38	91.67	cardboard/cellulose	0.93	anthropogenic cellulosic	2522.03
			CELLOPHANE	55.36	papercup cellulosic	0.93
			methyl cellulose#128	48.06	cellulose	0.87
			CELLOPHANE	46.91	cellulose	0.86
			HYDROXYETHYL-BETA-CYCLODEXTRIN MS=1.6	45.67	cellulose	0.86
GS 21-2	fiber	clear	CELLOPHANE	79.87	cardboard/cellulose	0.98	anthropogenic cellulosic	618.91
			BENTONITE (brown)	79.13	papercup cellulosic	0.97
			fibre grass#85	78.51	cellulose	0.96
			*Mask 128S GeATR #2	78.28	cellulose	0.95
			wood mahagoni#96	76.4	hydroxyethyl cellulose	0.91
GS 26-1	fiber	clear	cellulose#34	89.07	cardboard/cellulose	0.98	anthropogenic cellulosic	2674.97
			CELLOPHANE	83.42	papercup cellulosic	0.97
			fibre viscose#308	80.85	cellulose	0.95
			fibre viscose dyed#309	78.06	cellulose	0.94
			hydroxyethyl cellulose#100	74.06	cellulose	0.92
GS 26-13	fiber	blue	CELLOPHANE	76.83	cardboard/cellulose	0.91	anthropogenic unknown	364.09
			cellulose#34	72.72	papercup cellulosic	0.91
			BENTONITE (brown)	72.15	cellulose	0.88
			fibre grass#85	70.63	cellulose	0.87
			wood mahagoni#96	66.94	cellulose	0.85
GS 26-14	fiber	clear	CELLOPHANE	84.11	cardboard/cellulose	0.98	anthropogenic cellulosic	1464.95
			BENTONITE (brown)	79.57	papercup cellulosic	0.97
			fibre grass#85	79.15	cellulose	0.96
			wood mahagoni#96	77.41	cellulose	0.94
			cellulose wipe#113	77.31	cellulose	0.92
GS 28-5	fiber	clear	cellulose#34	88.27	cardboard/cellulose	0.98	anthropogenic cellulosic	1245.99
			CELLOPHANE	85.17	papercup cellulosic	0.97
			fibre viscose#308	81.41	cellulose	0.93
			fibre viscose dyed#309	79.24	cellulose	0.93
			fibre grass#85	73.59	hydroxyethyl cellulose	0.91
GS 36-2	fiber	clear	fibre cotton combers#47	85.93	cardboard/cellulose	0.94	Natural	917.67
			cellulose#31	85.06	papercup cellulosic	0.94
			fibre cotton US pima#48	83.63	leaf-plant	0.89
			Cellulose acetate filter ATR 64	83.42	methyl cellulose	0.89
			fibre cotton uzbekistan#49	83.2	cellulose	0.89
GS 39-3	fiber	clear	*Mask 128S GeATR#2	94.47	cardboard/cellulose	0.98	anthropogenic cellulosic	857.86
			cellulose#31	91.25	papercup cellulosic	0.97
			cellulose wipe#113	89.02	cellulose	0.96
			fibre linen#122	87.51	cellulose	0.94
			Cellulose acetate filter ATR 64	87.39	cellulose	0.91
GS 41-3	fiber	clear	*Mask 128S GeATR #2	84.61	cardboard/cellulose	0.96	anthropogenic cellulosic	1437.28
			fibre grass#85	79.26	papercup cellulosic	0.95
			cellulose#31	78.32	cellulose	0.93
			cellulose wipe#113	77.33	cellulose	0.91
			fibre kapok#106	76.95	cellulose	0.88
GS 48-1	fiber	clear	CELLOPHANE	82.2	cardboard/cellulose	0.968	anthropogenic cellulosic	967.99
			*Mask 128S GeATR #2	81.45	papercup cellulosic	0.97
			fibre grass#85	81.02	cellulose	0.93
			cellulose#34	79.82	cellulose	0.92
			cellulose#31	78.05	methyl cellulose	0.91
GS 48-2	fiber	blue	*Mask 128S GeATR #2	91.49	cardboard/cellulose	0.96	anthropogenic unknown	367.05
			Cellulose acetate filter ATR 64	83.76	papercup cellulosic	0.96
			fibre cotton combers#47	83.18	cellulose	0.91
			cellulose#31	82.86	cellulose	0.9
			fibre cotton US pima#48	81.86	cellulose	0.87
GS 1-1	fiber	red	*Mask 128S GeATR #2	96.34	cardboard/cellulose	0.98	anthropogenic unknown	913.53
			cellulose#31	90.14	papercup cellulosic	0.98
			fibre cotton combers#47	88.12	cellulose	0.95
			Cellulose acetate filter ATR 64	87.78	cellulose	0.95
			fibre cotton US pima#48	86.48	hydroxyethyl cellulose	0.91
GS 58-5	fiber	blue	*Mask 128S GeATR#2	91.29	cardboard/cellulose	0.97	anthropogenic unknown	1105.14
			cellulose#31	83.55	papercup cellulosic	0.97
			cellulose wipe#113	80.88	cellulose	0.94
			fibre linen#122	79.87	cellulose	0.93
			fibre cotton combers#47	78.26	hydroxyethyl cellulose	0.91
