# Supplementary material for: Presence of microplastics and microparticles in Oregon Black Rockfish sampled near marine reserve areas
Source: PeerJ journal article supplement (doi:10.7717/peerj.14564), 2023-02-14

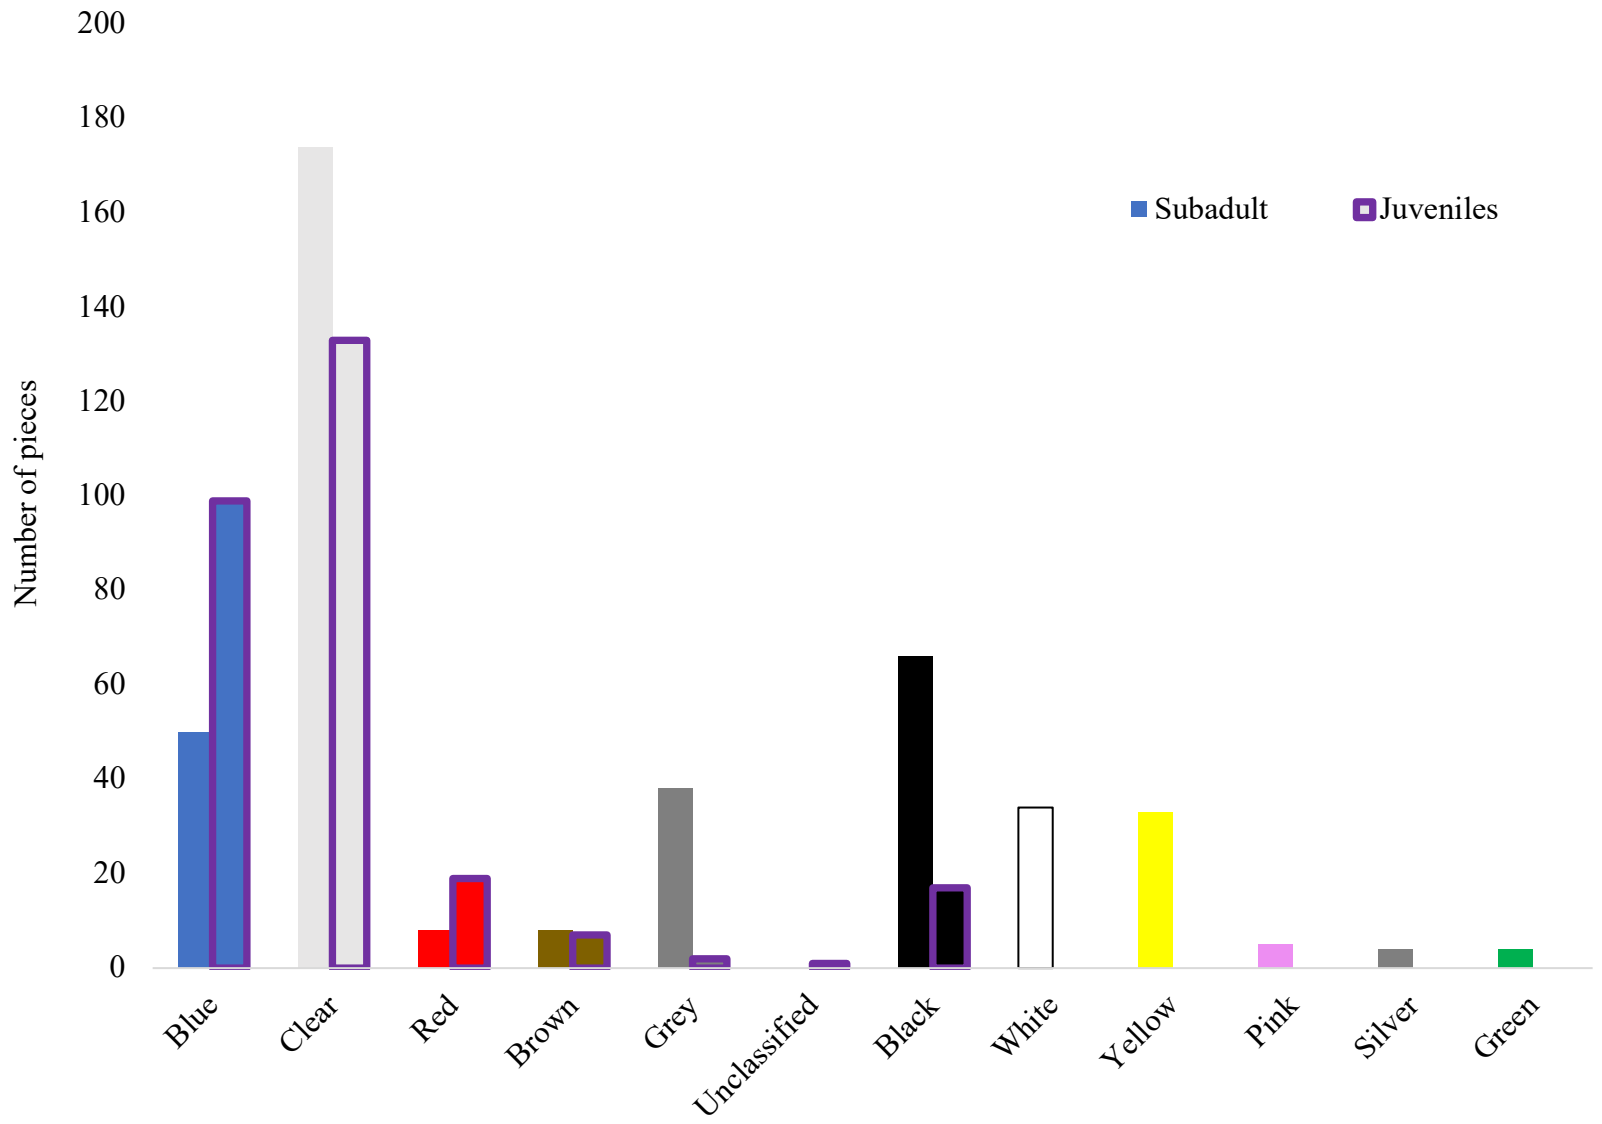

Supplement: Supplemental_Figure_1.pdf [file Supplemental_Figure_1.pdf]
