# Supplementary material for: Presence of microplastics and microparticles in Oregon Black Rockfish sampled near marine reserve areas
Source: PeerJ journal article supplement (doi:10.7717/peerj.14564), 2023-02-14
Supplement: Supplemental_Figure_2.pdf [file Supplemental_Figure_2.pdf]

| Index | Match | Compound Name                       | Library Name         |
|-------|-------|-------------------------------------|----------------------|
| 1     | 97.61 | polystyrene_expanded#64             | Sebastian database 2 |
| 2     | 97.48 | polystyrene_expanded#68             | Sebastian database 2 |
| 3     | 97.44 | PS 4. White Foam                    | FLOPPe               |
| 4     | 96.38 | PS 3. White Food Container Foam     | FLOPPe               |
| 5     | 96.25 | PS 13. Pink Spoon Fragment          | FLOPPe               |
| 6     | 96.17 | PS 6. White Foam                    | FLOPPe               |
| 7     | 96.15 | PS 8. Clear Pen Barrel Fragment     | FLOPPe               |
| 8     | 96.11 | PS 12. Orange Foam                  | FLOPPe               |
| 9     | 95.96 | PS 2. White Foam                    | FLOPPe               |
| 10    | 95.90 | PS 14. Clear Fridge Drawer Fragment | FLOPPe               |

A



| Index | Match | Compound Name                | Library Name         |
|-------|-------|------------------------------|----------------------|
| 1     | 98.25 | polyethylene_low_density#225 | Sebastian database 2 |
| 2     | 98.21 | polyethylene_low_density#119 | Sebastian database 2 |
| 3     | 98.12 | polyethylene_low_density#118 | Sebastian database 2 |
| 4     | 98.03 | polyethylene_low_density#273 | Sebastian database 2 |
| 5     | 98.00 | polyethylene_low_density#117 | Sebastian database 2 |
| 6     | 98.00 | polyethylene_foamed#109      | Sebastian database 2 |
| 7     | 97.86 | polyethylene_low_density#272 | Sebastian database 2 |
| 8     | 97.83 | polyethylene_low_density#123 | Sebastian database 2 |
| 9     | 97.62 | polyethylene_low_density#116 | Sebastian database 2 |
| 10    | 97.45 | polyethylene_low_density#219 | Sebastian database 2 |

B
